# Supplementary material for: Analysis of Intestinal Mucosa Integrity and GLP-2 Gene Functions upon Porcine Epidemic Diarrhea Virus Infection in Pigs
Source: MDPI journal article supplement (doi:10.3390/ani11030644), 2021-03-01
Supplement: s1 [file s1]

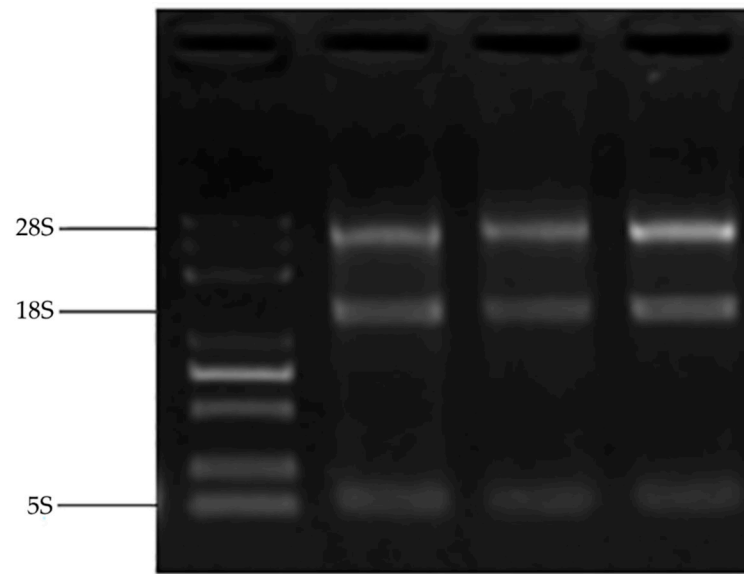

**Figure S1.** Gel electrophoresis of tissue total RNA

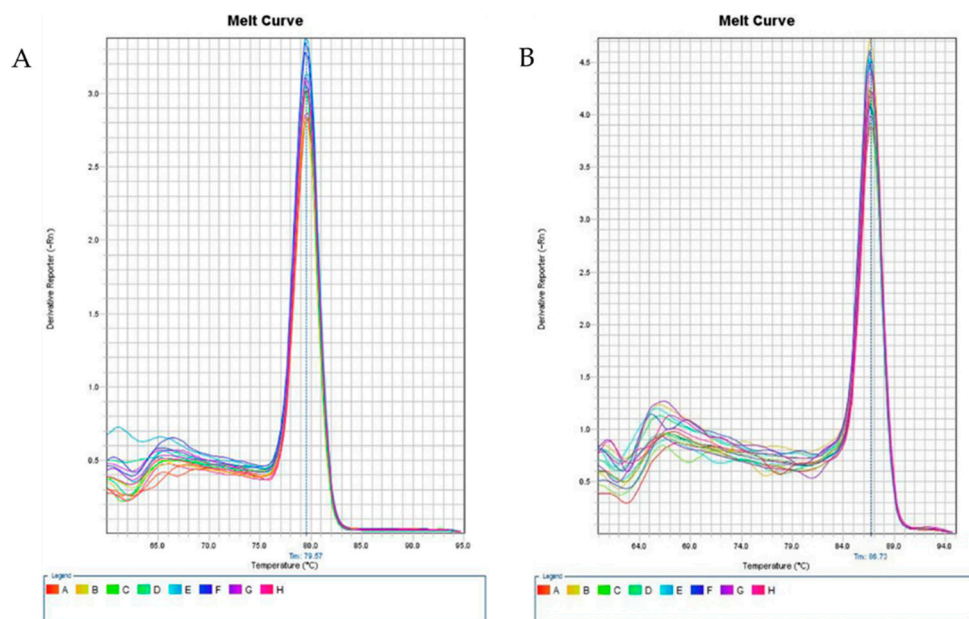

**Figure S2.** qPCR amplification curves. A and B represent *GLP-2* and *PEDV M* genes, respectively

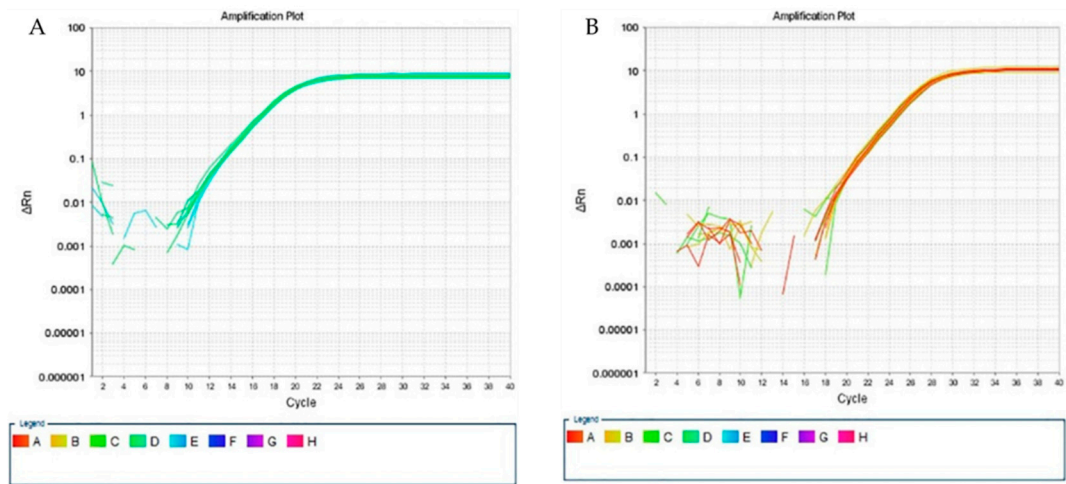

**Figure S3.** qPCR melting curves. A and B represent *GLP-2* and *PEDV M* genes, respectively
